# Bisphenol A Binds to Protein Disulfide Isomerase and Inhibits Its Enzymatic and Hormone-Binding Activities

Toyoko Hiroi, Kazushi Okada, Susumu Imaoka, Mayuko Osada, and Yoshihiko Funae

Department of Chemical Biology, Osaka City University Medical School, Osaka 545-8585, Japan

**Bisphenol A** [2,2-bis-(4-hydroxyphenyl) propane; BPA] is a versatile industrial material for plastic products, but is increasingly being recognized as a pervasive industrial pollutant as well. Accumulating evidence indicates that the environmental contaminant BPA is one of the endocrine-disrupting chemicals that potentially can adversely affect humans as well as wildlife. To define the molecular aspects of BPA action, we first investigated the molecules with which it physically interacts. High BPA-binding activity was detected in the P2 membrane fraction prepared from rat brains. As determined by SDS-PAGE analysis, the molecular mass of a BPA-binding protein purified from the rat brain P2 fraction was 53 kDa. The N-terminal amino acid sequence of the purified BPA-binding protein was identical with that of the rat

protein disulfide isomerase (PDI), which is a multifunctional protein that is critically involved in the folding, assembly, and shedding of many cellular proteins via its isomerase activity in addition to being considered to function as an intracellular hormone reservoir. The  $K_d$  value of BPA binding to recombinant rat PDI was  $22.6 \pm 6.6 \mu\text{M}$ . Importantly, the binding activity of  $L\text{-T}_3$  and  $17\beta$ -estradiol hormones to PDI was competitively inhibited by BPA in addition to abolishing its isomerase activities. In this paper we report that the ubiquitous and multifunctional protein PDI is a target of BPA and propose that binding to PDI and subsequent inhibition of PDI activity might be mechanistically responsible for various actions of BPA. (*Endocrinology* 147: 2773–2780, 2006)

**B**ISPHENOL A [2,2-bis-(4-hydroxyphenyl) propane; BPA] is widely used as a monomer for plastic products, including polycarbonate and other epoxy resins, which are used in the coating of food cans, dental sealants, etc. (1–3). BPA and several chlorinated derivatives of it are commonly found in industrial waste effluents, including those from paper-manufacturing plants (4), often leading to the contamination of ground water. As such, BPA and its derivatives are common pollutants of rivers, lakes, and seawater, resulting in chronic exposure of humans and wildlife to BPA. In fact, BPA has been detected in the sera and placentas of pregnant women as well as in amniotic fluid (5, 6). High concentrations of BPA (30  $\mu\text{g}/\text{ml}$ ; 131  $\mu\text{M}$ ) also have been detected in saliva after dental treatment (7). BPA is considered to be one of the most widespread endocrine-disrupting chemicals (EDCs), and recently, its adverse effects on human health and wildlife are being increasingly recognized.

Mounting evidence from numerous studies of BPA reveals that BPA has diverse influences on various physiological functions related to steroid hormones (8–11), thyroid hormones (12, 13), the nervous system (14–18), the immune system (19, 20), and other cell signaling pathways (21, 22). For example, BPA possesses estrogenic and antiandrogenic activities *in vitro* (1–3, 23, 24) and influences reproductive func-

tions, sexual differentiation, and behavioral patterns *in vivo* (8–11, 17). BPA is also demonstrated to antagonize  $L\text{-T}_3$  ( $T_3$ ) action *in vitro* (12, 25). In Sprague Dawley rats, dietary exposure to BPA during pregnancy and lactation causes an increase in the serum total  $T_4$  in pups postnatally (12). Prenatal and neonatal exposures of mice to BPA activate aggressive behavior (18), enhance dopamine D1 receptor-dependent rewarding effects induced by psychostimulant methamphetamines (14), and cause up-regulation of immune responses, especially T helper 1 responses in adulthood (19). Furthermore, BPA induces dopamine release in a nongenomic manner through guanine nucleotide-binding proteins and N-type calcium channels in cultured cells (15).

The actions of BPA *in vivo* and *in vitro* are very diverse and multiple, as indicated above. However, very little is known about the target molecules of BPA and the molecular mechanisms responsible for mediating its effects. As for the influence of BPA on steroid sex hormones, it has been demonstrated that BPA binds to nuclear estrogen receptor (ER) and acts as an agonist and also binds to human SHBG (hSHBG) and thereby disturbs the binding of endogenous sex hormones to hSHBG (23, 24, 26, 27). In addition, Niwa *et al.* (28) have shown that BPA competitively inhibits the activity of steroidogenic cytochrome P45017 (CYP17), suggesting that BPA also interferes with the biosynthesis of steroid hormones. These findings collectively support the idea that BPA shows estrogenic activity and interferes with the homeostasis of sex hormones such as  $17\beta$ -estradiol ( $E_2$ ) and testosterone. As for the influence of BPA on thyroid hormone, it has been shown that BPA binds to nuclear thyroid hormone receptor (TR) and acts as an antagonist in addition to binding to transthyretin (TTR) (25, 29). However, the affinity of BPA to TR seems to be relatively low at 200  $\mu\text{M}$ , and the major  $T_4$  carrier protein in humans is  $T_4$ -binding globulin, which ac-

First Published Online March 16, 2006

Abbreviations: BPA, Bisphenol A;  $B_{\text{max}}$ , maximal binding capacity; CYP17, cytochrome P45017;  $E_2$ ,  $17\beta$ -estradiol; EDC, endocrine-disrupting chemical; ER, estrogen receptor; h, human; InB, oxidized insulin chain B; P, pellet; PDI, protein disulfide isomerase; RNase, ribonuclease; rr, recombinant rat; S, supernatant; TR, thyroid hormone receptor; TTR, transthyretin.

*Endocrinology* is published monthly by The Endocrine Society (<http://www.endo-society.org>), the foremost professional society serving the endocrine community.

counts for 70–80% of thyroid hormone-binding activity, but not TTR, implying that the influence of BPA binding to TTR is of limited importance in humans. Thus, at present, despite BPA's various *in vitro* and *in vivo* activities, its target proteins remain obscure and ill defined.

In this study we focused our efforts on exploring and defining target molecules of BPA. We demonstrate by direct binding studies that protein disulfide isomerase (PDI; EC 5.3.4.1) is a novel target of BPA and also provide evidence indicating that the binding of BPA to PDI results in the disruption of PDI actions, which could, in turn, adversely affect many cellular processes.

## Materials and Methods

### Materials

BPA was purchased from Wako Pure Chemical Industries Ltd. (Osaka, Japan). [ $^3\text{H}$ ]BPA ([ $^3\text{H}$ ]BPA; specific activity, 5 Ci/mmol) was obtained from Moravak Biochemicals, Inc. (Brea, CA). [ $^{125}\text{I}$ ]T<sub>3</sub> (specific activity, 97.3 Ci/mmol) and [2,4,6,7- $^3\text{H}$ ]E<sub>2</sub> ([ $^3\text{H}$ ]E<sub>2</sub>; specific activity, 95 Ci/mmol) were products of PerkinElmer Life and Analytical Sciences, Inc. (Boston, MA). Sucrose monolaurate was purchased from DOJINDO Laboratories (Kumamoto, Japan). T<sub>3</sub>, E<sub>2</sub>, protease inhibitor cocktails, bacitracin, oxidized insulin chain B (InB), and ribonuclease A (RNase) type III from bovine pancreas were purchased from Sigma-Aldrich Corp. (St. Louis, MO). All other chemicals were obtained from Wako Pure Chemical Industries Ltd. BPA and E<sub>2</sub> were dissolved in ethanol at 100 mM to make stock solutions and were stored at –20 C. T<sub>3</sub> was dissolved in 0.1 M NaOH at 10 mM to make stock solutions and was stored at –20 C. Appropriate vehicle controls were performed in all experiments.

### Preparation of subcellular fractions from rat brains

All steps in this procedure were carried out at 4 C. Adult male rats (Sprague Dawley; 6 wk old; CLEA Japan, Inc., Tokyo, Japan) were killed by decapitation. Whole brains were harvested and rinsed in ice-cold homogenate buffer [10 mM Tris-HCl buffer (pH 7.5) including 0.32 M sucrose and 0.05% protease inhibitor cocktail] to eliminate blood and other debris. The brains were homogenized in 9 vol (wt/vol) of the homogenate buffer by 10 strokes at 900–1000 rpm using a Teflon-glass homogenizer, then the brain homogenate was centrifuged at 1500 × g for 10 min. The supernatant (S1) was subjected to an additional centrifugation step at 17,500 × g for 15 min. The pellet obtained (P2) was suspended in the homogenate buffer and washed by centrifugation at 17,500 × g for 15 min. The supernatant (S2) was centrifuged at 100,000 × g for 60 min and separated into supernatant (S3) and pellet fractions (P3). The pellet (P3) was then suspended in homogenate buffer and washed by centrifugation at 100,000 × g for 60 min.

### Radioligand binding assay

The P2 membrane fraction (50 μg protein) was incubated with radioligands ([ $^3\text{H}$ ]BPA, [ $^{125}\text{I}$ ]T<sub>3</sub>, or [ $^3\text{H}$ ]E<sub>2</sub>) in 0.5 ml binding buffer [50 mM Tris-HCl buffer (pH 7.0) containing 150 mM NaCl] for 2 h at 4 C. The reaction mixture was centrifuged at 14,500 rpm for 5 min at 4 C. Pellets were washed twice in ice-cold binding buffer and dissolved in 0.2 ml 0.1 M NaOH. In the experiments using subcellular fractions prepared from rat brains, the reaction mixture was aspirated rapidly through a GF/B filter (Whatman, Middlesex, UK), and the filter was washed three times with 3 ml ice-cold binding buffer. In the case of purified recombinant PDI, proteins in the reaction mixture were precipitated by adding 0.5 ml binding buffer including 12% polyethylene glycol 6000 and 0.2 M ZnCl<sub>2</sub>. After centrifugation at 14,500 rpm for 5 min at 4 C, the pellets were washed twice in ice-cold binding buffer including 6% polyethylene glycol 6000 and 0.1 M ZnCl<sub>2</sub> and finally dissolved in 0.2 ml 0.1 M NaOH. The radioactivity in each sample was counted in Pico-Fluor 40 scintillation cocktail (PerkinElmer, Norwalk, CT) using a β-counter (LS 6500, Beckman Coulter, Inc., Fullerton, CA) or a γ-counter (auto well γ-counter ARC-2000, Aloka Co. Ltd., Tokyo, Japan). Nonspecific binding was

defined in the presence of 1 mM unlabeled BPA, 30 μM unlabeled T<sub>3</sub>, or 100 μM unlabeled E<sub>2</sub>. Specific binding was defined as bound radioactivity, calculated by subtracting nonspecific from total binding. In the case of competitive binding assay, competing ligands were added to the reaction mixture. Saturation studies were performed with nine concentrations of [ $^3\text{H}$ ]BPA.

### Preparation of BPA affinity resin

BPA amine derivative (Fig. 1) was a gift from Kobe Natural Products and Chemicals Co. Ltd. (Hyogo, Japan). BPA-Sepharose resin was prepared by coupling BPA amine derivative to cyanogen bromide-activated Sepharose 4B (Amersham Biosciences, Piscataway, NJ) according to the manufacturer's instructions.

### Purification of BPA-binding proteins from rat brains

All steps were carried out at 4 C. Rat brain P2 fraction (250 mg proteins) was solubilized in homogenate buffer containing 0.5% sucrose monolaurate with gentle stirring for 60 min and then centrifuged at 100,000 × g for 60 min. The supernatant was loaded onto an anion ion exchange Whatman DE52 column (2.5 × 5.0 cm) equilibrated with 50 mM Tris-HCl buffer (pH 7.0; buffer A). The proteins were eluted stepwise with 12.5 ml buffer A containing 0.1, 0.2, or 0.5 M NaCl. The BPA-binding activity and protein concentration in each fraction were measured. The fraction, which had high [ $^3\text{H}$ ]BPA binding activity, was concentrated by ultrafiltration using Amicon (Millipore Corp., Billerica, MA). The concentrated fraction was incubated for 2 h with gentle rotation in 2 ml BPA-Sepharose affinity resin equilibrated with buffer A. BPA-Sepharose affinity resin was washed in 50 mM Tris-HCl buffer (pH 7.0) containing 0.15 M NaCl (buffer B), and bound proteins were eluted with gentle mixing for 1 h in buffer B containing 2 mM BPA.

### Cloning and expression of rat PDI

Total RNA was extracted from a rat brain (Sprague Dawley; male; 6 wk old; CLEA Japan, Inc.) using total RNA isolation reagent (Isogen, Nippon Gene, Toyama, Japan). After deoxyribonuclease treatment (Nippon Gene) to remove contaminating genomic DNA, total RNA was reverse transcribed using an RNA PCR kit (Takara Bio, Inc., Shiga, Japan) according to the manufacturer's instructions. The reaction mixture, containing 5 U reverse transcriptase avian myeloblastosis virus, 1 × RT-PCR buffer, 1 mM deoxy-NTPs, 2.5 μM random 9-mer primer, 20 U RNase inhibitor, and 2 μg total RNA, was incubated at 55 C for 60 min. RT was terminated by heating to 99 C for 5 min. Oligonucleotide primers for rat PDI for PCR were designed as previously reported (30). The forward and reverse primers for the 5' upstream fragment of PDI were 5'-GGG GGG ATC CTC CGA CAT GCT GAG CCG TGC-3' and 5'-AGC GAT GAC GAT ATT CTC AT-3', respectively; the forward and reverse primers for the 3' downstream fragment of PDI were 5'-ACC TGA TGA GCC AGG AAC TG-3' and 5'-CCC TCG AGA GAT CTG GCT TCT GCA CTA C-3', respectively. PCR was carried out for 35 cycles using Pyrobest DNA polymerase (Takara Bio, Inc.) as follows: denaturation at 96 C for 60 sec, annealing at 56 C for 60 sec, and extension at 72 C for 150 sec. After digestion with *Bam*HI and *Eco*RI, the 5' upstream fragment of PDI and pBluescript vector (Stratagene, La Jolla, CA) were ligated. Subsequently, the 3' downstream fragment of PDI and pBluescript vector containing the 5' upstream fragment of PDI were digested with *Eco*RI and *Xho*I, then ligated. The resulting full-length rat PDI cDNA in pBlue-

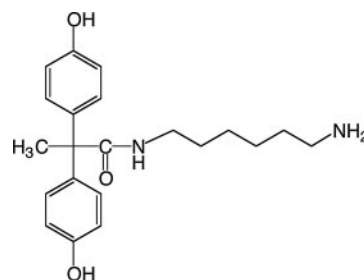

FIG. 1. Chemical structure of BPA amine derivative.

script was subcloned. Next, the pBluescript vector containing the full-length rat PDI cDNA was digested with *SacI* and *KpnI*, then cloned into the histidine-tagged expression vector pQE-80L (QIAGEN, Valencia, CA). The resulting plasmid was transfected into *Escherichia coli* DH5 $\alpha$  (Toyobo Co. Ltd., Osaka, Japan).

#### Purification of histidine-tagged fusion PDI

*E. coli* cells transformed with pQE-80L encoding the histidine-tagged PDI were grown at 37 C in 2 $\times$  yeast extract-Tryptone rich medium containing 0.1 mg/ml ampicillin. Protein expression was induced by adding 1.0 mM isopropylthio- $\beta$ -D-galactoside. After incubation for 4 h, *E. coli* cells were harvested and lysed in a lysis buffer (50 mM NaH<sub>2</sub>PO<sub>4</sub> (pH 8.0) containing 300 mM NaCl, 10 mM imidazole, 1.0 mg/ml lysozyme, and 0.5% protease inhibitor cocktail) for 60 min at 4 C. *E. coli* cell lysate was sonicated for 5 min, then incubated with 0.5% sucrose monolaurate for 60 min at 4 C with gentle stirring. The lysate sample was centrifuged at 50,000  $\times$  g for 30 min, and the supernatant was loaded onto a nickel-chelate-nitrilotriacetic acid agarose column (QIAGEN). After the column was washed with washing buffer (lysis buffer including 0.1% sucrose monolaurate), the protein was eluted with 50 mM NaH<sub>2</sub>PO<sub>4</sub> (pH 8.0) containing 300 mM NaCl, 250 mM imidazole, 0.5% protease inhibitor cocktail, and 0.1% sucrose monolaurate. The eluted fraction was dialyzed against 50 mM Tris-HCl buffer (pH 7.5).

#### PDI-mediated isomerase activity

The oxidative renaturation activity mediated by PDI was measured according to the method described by Lyles *et al.* (31) with some modifications. Reduced and denatured RNase A (8  $\mu$ M) was incubated with 1.4  $\mu$ M PDI in a final volume of 0.5 ml 100 mM Tris-HCl buffer (pH 8.0) containing 4.5 mM cytidine 2',3'-cyclic monophosphate, 2 mM EDTA, 1 mM glutathione, and 0.2 mM glutathione disulfide at 25 C. The reaction was started by adding reduced and denatured RNase A. The changes in absorbance at 296 nm were monitored. Reduced and denatured RNase A was prepared as follows. RNase A (type III) from bovine pancreas was incubated for 16 h in denaturing buffer [100 mM Tris-HCl buffer (pH 8.0) containing 140 mM dithiothreitol, 2 mM EDTA, and 6 M guanidine HCl] at room temperature. Denaturing buffer was exchanged for 0.1% acetic acid using a Bio-Gel P6 spin column (Bio-Rad Laboratories, Hercules, CA). The concentrations of reduced and denatured RNase A were calculated by absorbance at 280 nm using an extinction coefficient of 9300 cm<sup>-1</sup> M<sup>-1</sup>.

#### Others

NH<sub>2</sub>-terminal amino acid sequences of the proteins were directly analyzed by automated Edman degradation using a protein sequencer (model 491, Procise, Applied Biosystems, Foster City, CA), after proteins were electrophoretically transferred to a polyvinylidene difluoride membrane at 2.0 mA/cm<sup>2</sup> membrane for 90 min in 100 mM Tris-HCl buffer (pH 8.3) containing 192 mM glycine and 20% methanol. Anti-PDI antiserum was prepared from rabbits immunized with purified histidine-tagged rat PDI. Anti-PDI IgG was purified using protein A-Sepharose CL-4B (Amersham Biosciences). SDS-PAGE and Western blot analyses were performed as described previously (32). The protein bands on SDS-PAGE gels were stained using a silver stain kit (Bio-Rad Laboratories, Inc.). For Western blot analysis, the nitrocellulose membrane was incubated with anti-PDI IgG for 1 h at room temperature. After washing three times with PBS containing 0.05% Tween 20 for 7 min each time, the nitrocellulose membrane was treated with the Vectastain ELITE ABC kit (Vector Laboratories, Inc., Burlingame, CA). Protein concentration was measured using the Bio-Rad protein assay kit. Kinetic analysis was performed using PRISM 3 (GraphPad, Inc., San Diego, CA). Animal treatments were performed under the standard methods of humane animal care. The protocol for this study was approved by the committee on the animal care and use of Osaka City University Medical School.

## Results

### BPA-binding proteins in rat brains

To explore target proteins of BPA, the BPA-binding activity of subcellular fractions (P2, P3, or S3) prepared from rat

brains was determined (Fig. 2A). Each subcellular fraction of rat brains had specific BPA-binding activity, and the P2 fraction showed the highest binding activity, followed by the S3 fraction. To characterize BPA-binding activity in the rat brain P2 fraction, saturation experiments were performed with nine different concentrations of [<sup>3</sup>H]BPA ranging from 3.05–52.5  $\mu$ M. The data were analyzed by means of Scatchard plots, and the apparent dissociation constant (K<sub>d</sub>), the maximal binding capacity (B<sub>max</sub>), and the Hill coefficient were

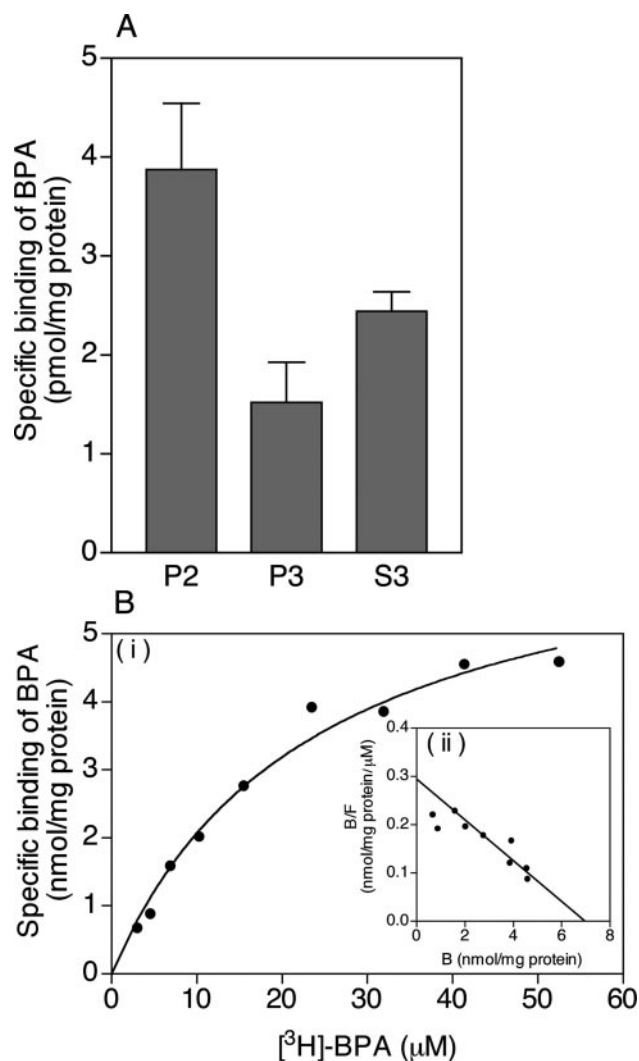

FIG. 2. BPA-binding activity in rat brains. A, BPA-binding activity of subcellular fractions prepared from rat brains. Each subcellular fraction (P2, P3, and S3 fractions; 1.5 mg protein) prepared from rat brains was incubated with 500 nM [<sup>3</sup>H]BPA in 3.0 ml binding buffer [50 mM Tris-HCl buffer (pH 7.0) containing 150 mM NaCl] for 2 h at 4 C. Nonspecific binding was defined in the presence of 1 mM unlabeled BPA. Data shown are the mean  $\pm$  SEM of triplicate determinations. B, BPA-binding activity of rat brain P2 fraction. P2 fraction (50  $\mu$ g protein) was incubated with nine concentrations of [<sup>3</sup>H]BPA, ranging from 3.05–52.52  $\mu$ M in 0.5 ml binding buffer [50 mM Tris-HCl buffer (pH 7.0) containing 150 mM NaCl] for 2 h at 4 C. Nonspecific binding was defined in the presence of 1 mM unlabeled BPA. The data shown are the means of duplicate determinations. Kinetic values were calculated from three independent experiments, i, Saturation curve of BPA binding to rat brain P2 fraction; ii, Scatchard analysis of [<sup>3</sup>H]BPA binding to rat brain P2 fraction.



determined (Fig. 2B). Scatchard plots of the saturation curves were linear. The Hill coefficient was 1.07, indicating that BPA bound to one site or more with the same apparent affinity. The  $K_d$  of the rat brain P2 fraction for [ $^3\text{H}$ ]BPA binding was  $27.0 \pm 3.9 \mu\text{M}$ , and the  $B_{\text{max}}$  was  $7.4 \pm 0.4 \text{ nmol/mg protein}$ .

#### Purification of BPA-binding proteins

BPA-binding proteins were purified from rat brain P2 membrane fractions. Initially six detergents, Triton X-100, sodium dodecyl sulfate, sodium cholate, 3-[(3-cholamidopropyl)dimethylammonio]-1-propanesulfonate, Emulgen 913 (Kao Chemicals, Osaka, Japan), and sucrose monolaurate were tested to solubilize membrane proteins, and sucrose monolaurate was finally selected because of its high yield of solubilization and retention of BPA-binding activity (data not shown). The BPA-binding activity and protein concentration in each eluted fraction from Whatman DE52 column were measured (Table 1). The fraction eluted with 50 mM Tris-HCl buffer (pH 7.0) containing 0.2 M NaCl had the highest BPA-binding activity. The purified fraction eluted from BPA-Sepharose affinity resin showed a single protein band on SDS-PAGE analysis (Fig. 3A, lane 5). The molecular mass of this protein was calculated to be 53 kDa on an SDS-PAGE gel. The  $\text{NH}_2$ -terminal amino acid sequence of this purified protein was 1-DALEEEDNVLV-LKKSNAEALAAHNYLLVEFYA-33, which is identical with that of rat PDI (29). In Western blotting analysis, the purified protein was recognized by anti-PDI antibody (Fig. 3B), confirming its identity as PDI.

#### BPA-binding properties of recombinant PDI

The BPA-binding activity of PDI was also characterized using recombinant rat PDI protein (rrPDI). For this experiment, first we cloned rat PDI cDNA, then expressed it in *E. coli* and purified the recombinant protein as a histidine-tagged fusion protein. Saturation experiments of BPA binding to rrPDI were performed with nine different concentrations of [ $^3\text{H}$ ]BPA ranging from 0.4–43.1  $\mu\text{M}$ . The data were analyzed by means of Scatchard plots, and the  $K_d$ ,  $B_{\text{max}}$ , and Hill coefficient were determined (Fig. 4A). Scatchard plots were linear, and the Hill coefficient was 1.01. The  $K_d$  of rrPDI for [ $^3\text{H}$ ]BPA was  $22.6 \pm 6.6 \mu\text{M}$ , and the  $B_{\text{max}}$  was  $2.5 \pm 0.8 \text{ nmol/mg protein}$ . These kinetic parameters of rrPDI for

**TABLE 1.** The BPA-binding activity and protein contents in the fractions eluted from anion ion exchange chromatography

| Fraction eluted by (M NaCl) | Total protein (mg) | Total BPA binding [dpm ( $\times 1000$ )] | BPA binding/protein [dpm ( $\times 1000$ )/mg] |
|-----------------------------|--------------------|-------------------------------------------|------------------------------------------------|
| 0.1                         | 15.3               | 50                                        | 3.3                                            |
| 0.2                         | 5.0                | 135                                       | 27.0                                           |
| 0.5                         | 12.0               | 140                                       | 11.7                                           |

Solubilized P2 membrane fraction was loaded onto a Whatman DE52 column ( $2.5 \times 5.0 \text{ cm}$ ) equilibrated with 50 mM Tris-HCl buffer (pH 7.0). Proteins were eluted with 12.5 ml of 50 mM Tris-HCl buffer (pH 7.0) containing 0.1, 0.2, or 0.5 M NaCl. For measurement of BPA-binding activity, 125  $\mu\text{l}$  of each fraction was incubated with 500 nM [ $^3\text{H}$ ]BPA in 3.0 ml of 50 mM Tris-HCl buffer (pH 7.0) containing 150 mM NaCl for 2 h at 4 C. The reaction mixture was aspirated rapidly through a GF/B filter, and the filter was washed three times with 3 ml ice-cold binding buffer. Protein concentration was measured by the method of Bradford. Data shown are means of triplicate.

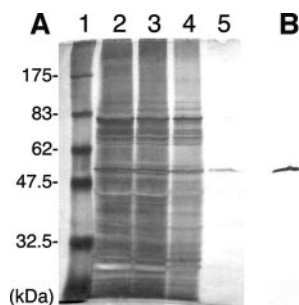

**FIG. 3.** SDS-PAGE and Western blotting analysis of the purified BPA-binding protein. A, SDS-PAGE analysis. The fractions in purification procedures were applied to a 10% SDS-PAGE gel. The protein bands were visualized by silver staining. Lane 1, Molecular mass standards; lane 2, the fraction eluted by 0.2 M NaCl from Whatman DE52 anion ion exchange chromatography (10  $\mu\text{l}$ ; 4  $\mu\text{g}$ ); lane 3, flow-through fraction from BPA affinity chromatography (10  $\mu\text{l}$ ; 10  $\mu\text{g}$ ); lane 4, washing fraction from BPA affinity chromatography (10  $\mu\text{l}$ ); lane 5, the fraction eluted by 2 mM BPA from BPA affinity chromatography (10  $\mu\text{l}$ ; 0.3  $\mu\text{g}$ ). B, Western blotting. The fraction eluted (10  $\mu\text{l}$ ; 0.3  $\mu\text{g}$ ) with 2 mM BPA from BPA affinity chromatography was applied to a 10% SDS-PAGE gel and electrophoretically transferred to a nitrocellulose membrane. The nitrocellulose membrane was incubated with anti-PDI IgG for 1 h at room temperature.

BPA-binding activity were comparable to those of the rat brain P2 fraction shown in Fig. 2B. These results confirmed that PDI possessed BPA-binding activity and also that the BPA-binding protein found in the rat brain P2 fraction was indeed PDI. In addition, our preliminary experiments using recombinant human PDI, the  $K_d$  value of BPA to recombinant human PDI was  $17.51 \pm 3.93 \mu\text{M}$ , a value close to what was observed with rrPDI. Based on these similar binding profiles, it is tempting to speculate that human PDI would also be sensitive to BPA-mediated effects.

PDI has been characterized as a multifunctional protein and shown to bind peptides, proteins, and hormones (33–36). A recent report suggested that there are at least three binding sites on the PDI molecule (34), with one site involved in protein/peptide binding, whereas the remaining two sites are hormone-binding sites. To determine which site(s) on PDI was responsive to BPA binding, competitive binding experiments were performed using unlabeled BPA,  $T_3$ ,  $E_2$ , bacitracin, and InB as competitors (Fig. 4B). Both bacitracin, a cyclic peptide antibiotic, and InB are considered to be specific ligands for protein/peptide binding site on PDI (34). [ $^3\text{H}$ ]BPA binding to rrPDI was competitively inhibited by both  $T_3$  and  $E_2$ , but not by InB and bacitracin, to less than 20% of the total binding. This observation suggested that BPA binds to hormone-binding sites on PDI in a similar fashion to  $T_3$  and  $E_2$ . Consistent with this idea, the  $\text{IC}_{50}$  values of  $E_2$ ,  $T_3$ , and BPA for [ $^3\text{H}$ ]BPA binding to rrPDI were 7.4, 8.0, and 19.6  $\mu\text{M}$ , respectively.

#### Effects of BPA on $T_3$ and $E_2$ binding to PDI

To assess the effects of BPA on  $T_3$  and  $E_2$  binding to PDI, competitive binding experiments were performed. rrPDI was incubated with 100 nM [ $^{125}\text{I}$ ] $T_3$  (Fig. 5A) or [ $^3\text{H}$ ] $E_2$  (Fig. 5B) in the presence of competing ligands. It has been reported previously that the  $K_d$  value of  $T_3$ -binding activity to the high affinity site on PDI was 57 or 21 nM (35, 36). However, we did

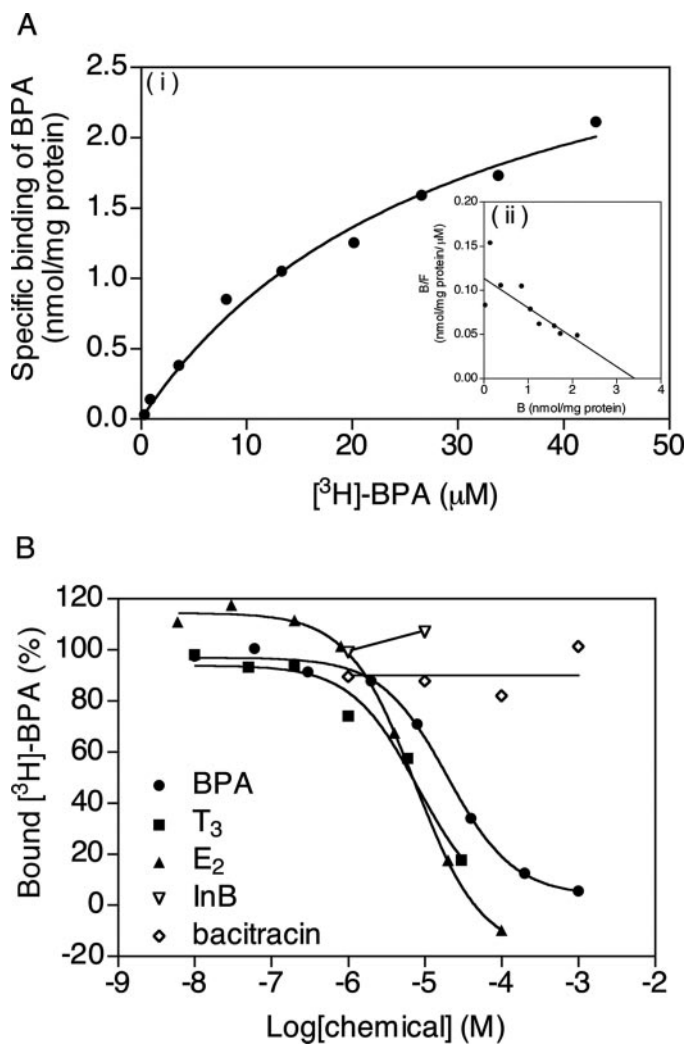

FIG. 4. A, BPA-binding activity of rrPDI. rrPDI (50  $\mu\text{g}$  protein) was incubated with nine concentrations of [<sup>3</sup>H]BPA ranging from 0.36–43.07  $\mu\text{M}$  in 0.5 ml binding buffer [50 mM Tris-HCl buffer (pH 7.0) containing 150 mM NaCl] for 2 h at 4 C. Nonspecific binding was determined in the presence of 1 mM unlabeled BPA. Data shown are the means of duplicate determinations. Kinetic values were calculated from three independent experiments. i, Saturation curve of BPA binding to rrPDI. ii, Scatchard analysis of [<sup>3</sup>H]BPA binding to rrPDI. B, Competitive BPA binding to rrPDI. rrPDI (50  $\mu\text{g}$  protein) was incubated with 100 nM [<sup>3</sup>H]BPA in the presence of competitors in 0.5 ml binding buffer [50 mM Tris-HCl buffer (pH 7.0) containing 150 mM NaCl] for 2 h at 4 C. T<sub>3</sub>, E<sub>2</sub>, InB, bacitracin, and unlabeled BPA were used as competitors in the assay. The data shown are the means of duplicate determinations and are expressed as a percentage of the total BPA binding.

not see such high affinity binding of T<sub>3</sub> to PDI in our experiments. Nonetheless, our data were comparable to those reported by Primm *et al.* (34). [<sup>125</sup>I]T<sub>3</sub> binding activity to rrPDI was inhibited by both BPA and E<sub>2</sub> (Fig. 5A). The IC<sub>50</sub> values of E<sub>2</sub>, T<sub>3</sub>, and BPA for [<sup>125</sup>I]T<sub>3</sub> binding to rrPDI were 3.5, 1.6, and 38.0  $\mu\text{M}$ , respectively. Also, [<sup>3</sup>H]E<sub>2</sub> binding activity to rrPDI was inhibited by both BPA and T<sub>3</sub> (Fig. 5B). The IC<sub>50</sub> values of E<sub>2</sub>, T<sub>3</sub>, and BPA for [<sup>3</sup>H]E<sub>2</sub> binding to rrPDI were 2.5, 6.4, and 27.0  $\mu\text{M}$ , respectively. These results suggested that BPA was able to work as a competitive inhibitor in PDI binding to T<sub>3</sub> and E<sub>2</sub>, although the affinity of BPA to the

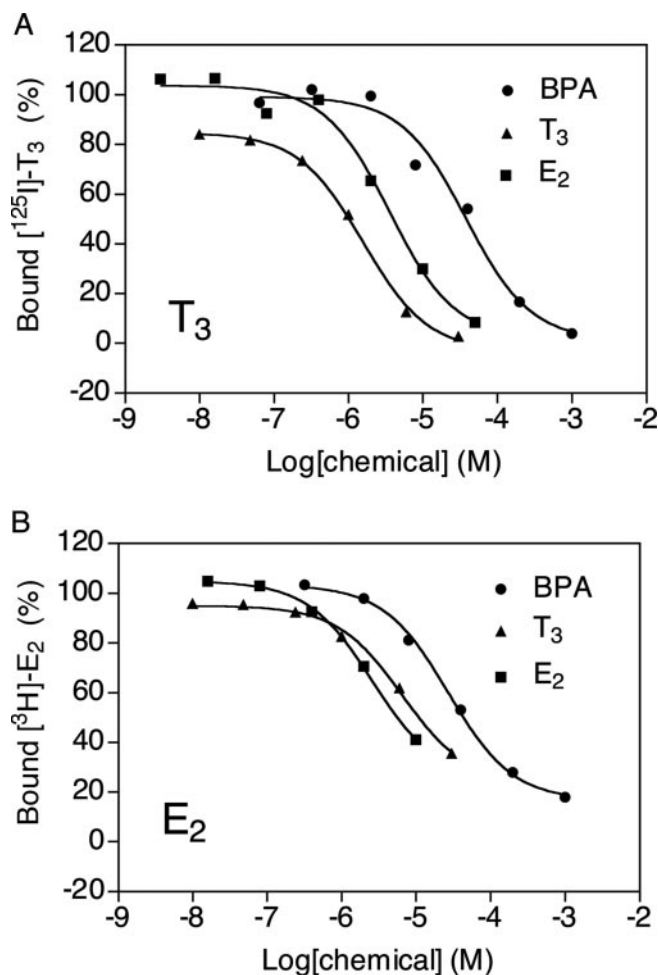

FIG. 5. Competitive binding assay of T<sub>3</sub> and E<sub>2</sub> to rrPDI. rrPDI (50  $\mu\text{g}$  protein) was incubated with 100 nM [<sup>125</sup>I]T<sub>3</sub> (A) or [<sup>3</sup>H]E<sub>2</sub> (B) in the presence of competitors in 0.5 ml binding buffer [50 mM Tris-HCl buffer (pH 7.0) containing 150 mM NaCl] for 2 h at 4 C. T<sub>3</sub>, E<sub>2</sub>, and unlabeled BPA were used as competitors. The data shown are the means of duplicate determinations and are expressed as a percentage of the total T<sub>3</sub> or E<sub>2</sub> binding.

hormone-binding site on PDI was lower than those of T<sub>3</sub> and E<sub>2</sub>.

#### Effects of BPA on PDI-mediated isomerase activity

PDI is also known to catalyze disulfide formation and rearrangement by thiol/disulfide exchange in eukaryotes (33, 37). Primm *et al.* (34) previously reported that E<sub>2</sub> and T<sub>3</sub> did not inhibit the catalytic or chaperone activity of PDI. However, contrary to this view, others have reported that T<sub>3</sub> and E<sub>2</sub> can, in fact, inhibit PDI-mediated isomerase activity (36, 38). We assessed the effects of BPA on PDI-mediated isomerase activity (Fig. 6). BPA had an inhibitory effect on PDI-mediated isomerase activity. The percentage of maximum inhibition by BPA was calculated to be 24%, a value slightly less than that of T<sub>3</sub> or E<sub>2</sub>. The IC<sub>50</sub> of BPA was 3.72  $\mu\text{M}$ , a value comparable to those of T<sub>3</sub> and E<sub>2</sub> (3.49 and 5.26  $\mu\text{M}$ , respectively), indicating that BPA could work as a potential inhibitor of PDI activity similar to T<sub>3</sub> and E<sub>2</sub>.

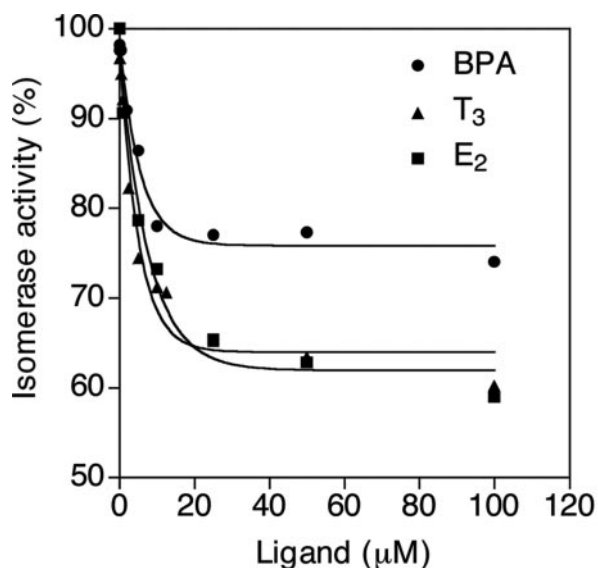

Kinetic parameters of BPA, T<sub>3</sub>, and E<sub>2</sub> in isomerase activity of PDI

| Ligand         | max of inhibition (%) | IC <sub>50</sub> (μM) |
|----------------|-----------------------|-----------------------|
| T <sub>3</sub> | 36                    | 3.49                  |
| E <sub>2</sub> | 38                    | 5.26                  |
| BPA            | 24                    | 3.72                  |

FIG. 6. Effects of BPA on PDI-mediated isomerase activity. The activity of PDI-mediated RNase refolding was determined in the presence of BPA, T<sub>3</sub>, and E<sub>2</sub>. Denatured RNase A (8 μM) was incubated with 1.4 μM PDI in a final volume of 0.5 ml 100 mM Tris-HCl buffer (pH 8.0) containing 4.5 mM cytidine 2',3'-cyclic monophosphate, 2 mM EDTA, 1 mM glutathione, and 0.2 mM glutathione disulfide at 25°C. The data shown are the means of duplicate determinations and are expressed as a percentage of the total isomerase activity in the absence of ligands.

### Discussion

We conducted the present study to identify target molecules of BPA and to delineate the mechanistic actions of BPA. We identified PDI as a target protein of BPA and demonstrated that its activities were inhibited by BPA. Although PDI was initially thought to be an endoplasmic reticulum-associated isomerase involved in the formation and/or reshuffling of the disulfide bridges in proteins, it is ubiquitously present in many organelles such as endoplasmic reticulum, nuclear envelope, and plasma membranes as well as in the cytosol of cells (33, 37, 39, 40). In our BPA binding experiment, although the rat brain P2 membrane fraction showed the highest BPA-binding activity, both the P3 membrane fraction and cytosol fraction also displayed some binding activity. It is plausible that this result might reflect the ubiquitous existence of PDI protein or, alternatively, the presence of other molecules with putative BPA-binding activity as has been described previously, such as nuclear hormone receptors, transthyretin, and CYP17 (23–29).

PDI is recognized to be a multifunctional protein, and its expression has been shown to be regulated by T<sub>3</sub> and E<sub>2</sub>

(41–44). The rearrangement of disulfide bonds mediated by PDI is essential for cell viability in eukaryotes. PDI covalently binds to peptides and proteins and works as an isomerase (45). It also binds noncovalently to unfolded proteins to prevent their aggregation as a chaperone or to facilitate their aggregation as an antichaperone under certain conditions (46, 47). PDI-mediated isomerase activity is involved in the synthesis and regulation of many cellular proteins by mediating rearrangement of disulfide bonds (33, 37). For example, in an *in vitro* study, PDI was shown to be responsible for multimerization of thyroglobulin, which is a precursor of thyroid hormone, in the follicular lumen of the thyroid gland (48, 49). The membrane-associated PDI was also shown to participate in the reduction of disulfide bridges, resulting in the shedding of α-subunits of TSH receptors expressed on the plasma membranes of thyrocytes (50). PDI also has been implicated in the regulation of leukocytes adhesion (51). Thus, PDI appears to influence a multitude of physiological functions. In this study we demonstrated that BPA possesses inhibitory effects on PDI-mediated isomerase activity, suggesting that BPA might have potential in disrupting various physiological functions by its inhibitory actions on PDI.

PDI is also known to be a hormone-binding protein (34–36). Primm *et al.* (34) demonstrated that there are two hormone-binding sites and one peptide/protein-binding site on PDI. T<sub>3</sub> binds to both hormone-binding sites on PDI with comparable affinity, but E<sub>2</sub> binds to only one of the hormone-binding sites. However, in our experiments with rrPDI, the Scatchard plots for [<sup>3</sup>H]BPA binding were linear, and the Hill coefficient was 1.01, indicating that BPA binds to a single site on PDI or, alternatively, to multiple sites with the same apparent affinity. In addition, the binding of BPA to rrPDI was competitively inhibited to less than 20% of the total binding by T<sub>3</sub> or E<sub>2</sub>. Conversely, T<sub>3</sub> binding to rrPDI was almost completely inhibited by BPA, T<sub>3</sub>, or E<sub>2</sub>, and E<sub>2</sub> binding was also inhibited by BPA, T<sub>3</sub>, and E<sub>2</sub>. Based on these results, we propose that PDI has either one binding site for T<sub>3</sub>, E<sub>2</sub>, and BPA or two binding sites with the same affinity for each of these three compounds, contrary to what was previously proposed by Primm *et al.* (34).

The demonstration that BPA had inhibitory effects on T<sub>3</sub> and E<sub>2</sub> binding to PDI implies that BPA could potentially displace T<sub>3</sub> and E<sub>2</sub> from PDI. Because T<sub>3</sub> and E<sub>2</sub> are pivotally involved in brain development (52, 53), the physiological significance of T<sub>3</sub> and E<sub>2</sub> binding to PDI is of great interest and needs to be clarified. The K<sub>d</sub> values of T<sub>3</sub> and E<sub>2</sub> binding to rrPDI were reported to be 4.3 and 2.1 μM, respectively (34). The affinities of T<sub>3</sub> and E<sub>2</sub> for their specific nuclear receptors are known to be in the nanomolar range; thus, the affinities of T<sub>3</sub> and E<sub>2</sub> for PDI are lower than those for their cognate nuclear receptors. However, PDI was identified, using a photoaffinity labeling technique, as a major T<sub>3</sub>-binding protein in plasma membranes (39). PDI is ubiquitously expressed in cells and is reported to be an abundant protein in mammalian cells, corresponding to 0.35–0.4% of the total cellular protein in mouse and rat liver cells (54). From these observations, Primm *et al.* (34) estimated that approximately 90% of the intercellular hormones would bind to PDI and proposed that PDI may function to preserve the homeostasis of hormone molecules as a reservoir and to buffer the hormone concen-



tration in the cells to allow hormones to bind to their cognate receptors.

Furthermore, PDI is thought to participate in the inactivation of type 2 iodothyronine 5'-deiodinase, which is a key enzyme for converting  $T_4$  to bioactive  $T_3$  in the brain (55, 56) and also in the association of estrogen receptor with estrogen response element (57). All these findings collectively suggest that PDI is likely to influence  $T_3$  and/or  $E_2$  hormonal activities in multiple ways. Conversely,  $T_3$  and  $E_2$  could alter the expression levels of PDI (41–44) and inhibit its isomerase activity (36, 38), although the physiological significance/role of  $T_3$  and/or  $E_2$  in regulating PDI expression and its activity remain to be clarified. Thus, it is likely that PDI might be closely involved in  $T_3$  and  $E_2$  functional and/or regulatory systems.

In conclusion, we report that the ubiquitous and multi-functional protein PDI is a target of BPA. We also propose a potential molecular mechanism that is operational via PDI to mediate the adverse effects of BPA. Our findings will facilitate understanding of multiple influences of EDCs, including BPA, on health and development and on the utility of using PDI in screening methods for EDCs.

### Acknowledgments

We thank Ms. Atsuko Tominaga and Ms. Kayo Yamamoto for their excellent technical assistance, and Dr. Noriaki Shimada, Mr. Kouichi Shibusawa, and Mr. Ryoji Sakakibara (Daiichi Pure Chemicals Co. Ltd., Tokyo, Japan) for their useful advice and stimulating discussions about the binding assay. We also thank Mr. Kouji Hayashi and Mr. Katsutoshi Hirose (Kobe Natural Products and Chemicals Co. Ltd., Hyogo, Japan) for providing BPA derivatives.

Received September 27, 2005. Accepted March 9, 2006.

Address all correspondence to: Dr. Toyoko Hiroi, Pulmonary Critical Care Medicine Branch, National Heart, Lung, and Blood Institute, National Institutes of Health, Building 10, Room 5N307, 10 Center Drive, Bethesda, Maryland 20892-1434. E-mail: hiroit@nhlbi.nih.gov. Address requests for reprints to: Dr. Yoshihiko Funae, Department of Chemical Biology, Osaka City University Medical School, 1-4-3, Asahimachi, Abeno-ku, Osaka 545-8585, Japan. E-mail: funae@med.osaka-cu.ac.jp.

This work was performed at Osaka City University (Osaka, Japan) and was supported exclusively by Japanese grants. This work was supported in part by Health Sciences Research Grants for Research on Environmental Health and Health; Labor Sciences Research Grants for Research on Food and Chemical Safety from the Ministry of Health, Labor, and Welfare of Japan; Grants-in-Aid for Scientific Research from the Ministry of Education, Culture, Sports, Science and Technology of Japan; and a Grant-in-Aid for Scientific Research from the Japan Public Health Association.

Present address of S.I.: School of Science and Technology, Kwansai Gakuin University, 2-1 Gakuen, Sanda, Hyogo 669-1337, Japan.

Present address of M.O.: Department of Pathological Biochemistry, Kyoto Pharmaceutical University, Misasagi, Yamashina-ku, Kyoto 607-8414, Japan.

K.O., S.I., and M.O. have nothing to declare. T.H. and Y.F. are inventors (Japanese patent 2002-246351), based partly on this work.

### References

- Krishnan AV, Stathis P, Permuth SF, Tokes L, Feldman D 1993 Bisphenol-A: an estrogenic substance is released from polycarbonate flasks during autoclaving. *Endocrinology* 132:2279–2286
- Brotons JA, Olea-Serrano MF, Villalobos M, Pedraza V, Olea N 1995 Xenestrogens released from lacquer coatings in food cans. *Environ Health Perspect* 103:608–612
- Takahashi A, Higashino F, Aoyagi M, Kyo S, Nakata T, Noda M, Shindoh M, Kohgo T, Sano H 2004 Bisphenol A from dental polycarbonate crown upregulates the expression of hTERT. *J Biomed Mater Res* 71B:214–221
- Fukazawa H, Hoshino K, Shiozawa T, Matsushita H, Terao Y 2001 Identification and quantification of chlorinated bisphenol A in wastewater from wastepaper recycling plants. *Chemosphere* 44:973–979
- Schonfelder G, Wittfoht W, Hopp H, Talsness CE, Paul M, Chahoud I 2002 Parent bisphenol A accumulation in the human maternal-fetal-placental unit. *Environ Health Perspect* 110:A703–A707
- Ikezuki Y, Tsutsumi O, Takai Y, Kamei Y, Taketani Y 2002 Determination of bisphenol A concentrations in human biological fluids reveals significant early prenatal exposure. *Hum Reprod* 17:2839–2841
- Olea N, Pulgar R, Perez P, Olea-Serrano F, Rivas A, Novillo-Fertrell A, Pedraza V, Soto AM, Sonnenschein C 1996 Estrogenicity of resin-based composites and sealants used in dentistry. *Environ Health Perspect* 104:298–305
- Akingbemi BT, Sottas CM, Koulouva AI, Klinefelter GR, Hardy MP 2004 Inhibition of testicular steroidogenesis by the xenoestrogen bisphenol A is associated with reduced pituitary luteinizing hormone secretion and decreased steroidogenic enzyme gene expression in rat Leydig cells. *Endocrinology* 145:592–603
- Howdeshell KL, Hotchkiss AK, Thayer KA, Vandenberg JG, vom Saal FS 1999 Exposure to bisphenol A advances puberty. *Nature* 401:763–764
- Gupta C 2000 Reproductive malformation of the male offspring following maternal exposure to estrogenic chemicals. *Proc Soc Exp Biol Med* 224:61–68
- Palanza PL, Howdeshell KL, Parmigiani S, vom Saal FS 2002 Exposure to a low dose of bisphenol A during fetal life or in adulthood alters maternal behavior in mice. *Environ Health Perspect* 110(Suppl 3):415–422
- Zoeller RT, Bansal R, Parris C 2005 Bisphenol-A, an environmental contaminant that acts as a thyroid hormone receptor antagonist *in vitro*, increases serum thyroxine, and alters RC3/neurogranin expression in the developing rat brain. *Endocrinology* 146:607–612
- Seiwa C, Nakahara J, Komiyama T, Katsu Y, Iguchi T, Asou H 2004 Bisphenol A exerts thyroid-hormone-like effects on mouse oligodendrocyte precursor cells. *Neuroendocrinology* 80:21–30
- Suzuki T, Mizuo K, Nakazawa H, Funae Y, Fushiki S, Fukushima S, Shirai T, Narita M 2003 Prenatal and neonatal exposure to bisphenol-A enhances the central dopamine D1 receptor-mediated action in mice: enhancement of the methamphetamine-induced abuse state. *Neuroscience* 117:639–644
- Yoneda T, Hiroi T, Osada M, Asada A, Funae Y 2003 Non-genomic modulation of dopamine release by bisphenol-A in PC12 cells. *J Neurochem* 87:1499–1508
- Masuo Y, Ishido M, Morita M, Oka S 2004 Effects of neonatal treatment with 6-hydroxydopamine and endocrine disruptors on motor activity and gene expression in rats. *Neural Plast* 11:59–76
- Kubo K, Arai O, Omura M, Watanabe R, Ogata R, Aou S 2003 Low dose effects of bisphenol A on sexual differentiation of the brain and behavior in rats. *Neurosci Res* 45:345–356
- Kawai K, Nozaki T, Nishikata H, Aou S, Takii M, Kubo C 2003 Aggressive behavior and serum testosterone concentration during the maturation process of male mice: the effects of fetal exposure to bisphenol A. *Environ Health Perspect* 111:175–178
- Yoshino S, Yamaki K, Li X, Sai T, Yanagisawa R, Takano H, Taneda S, Hayashi H, Mori Y 2004 Prenatal exposure to bisphenol A up-regulates immune responses, including T helper 1 and T helper 2 responses, in mice. *Immunology* 112:489–495
- Hong CC, Shimomura-Shimizu M, Muroi M, Tanamoto K 2004 Effect of endocrine disrupting chemicals on lipopolysaccharide-induced tumor necrosis factor- $\alpha$  and nitric oxide production by mouse macrophages. *Biol Pharm Bull* 27:1136–1139
- Masuno H, Iwanami J, Kidani T, Sakayama K, Honda K 2005 Bisphenol A accelerates terminal differentiation of 3T3-L1 cells into adipocytes through the phosphatidylinositol 3-kinase pathway. *Toxicol Sci* 84:319–327
- Kubo T, Maezawa N, Osada M, Katsumura S, Funae Y, Imaoka S 2004 Bisphenol A, an environmental endocrine-disrupting chemical, inhibits hypoxic response via degradation of hypoxia-inducible factor 1 $\alpha$  (HIF-1 $\alpha$ ): structural requirement of bisphenol A for degradation of HIF-1 $\alpha$ . *Biochem Biophys Res Commun* 318:1006–1011
- Sohoni P, Sumpter JP 1998 Several environmental oestrogens are also anti-androgens. *J Endocrinol* 158:327–339
- Kitamura S, Jinno N, Ohta S, Kuroki H, Fujimoto N 2002 Thyroid hormonal activity of the flame retardants tetrabromobisphenol A and tetrachlorobisphenol A. *Biochem Biophys Res Commun* 293:554–559
- Moriyama K, Tagami T, Akamizu T, Usui T, Saijo M, Kanamoto N, Hataya Y, Shimatsu A, Kuzuya H, Nakao K 2002 Thyroid hormone action is disrupted by bisphenol A as an antagonist. *J Clin Endocrinol Metab* 87:5185–5190
- Gaido KW, Leonard LS, Lovell S, Gould JC, Babai D, Portier CJ, McDonnell DP 1997 Evaluation of chemicals with endocrine modulating activity in a yeast-based steroid hormone receptor gene transcription assay. *Toxicol Appl Pharmacol* 143:205–212
- Dechaud H, Ravard C, Claustrat F, de la Perriere AB, Pugeat M 1999 Xenestrogen interaction with human sex hormone-binding globulin (hSHBG). *Steroids* 64:328–334
- Niwa T, Fujimoto M, Kishimoto K, Yabusaki Y, Ishibashi F, Katagiri M 2001 Metabolism and interaction of bisphenol A in human hepatic cytochrome P450 and steroidogenic CYP17. *Biol Pharm Bull* 24:1064–1067

29. Yamauchi K, Ishihara A, Fukazawa H, Terao Y 2003 Competitive interactions of chlorinated phenol compounds with 3,3',5-triiodothyronine binding to transthyretin: detection of possible thyroid-disrupting chemicals in environmental waste water. *Toxicol Appl Pharmacol* 187:110–117
30. Edman JC, Ellis L, Blacher RW, Roth RA, Rutter WJ 1985 Sequence of protein disulphide isomerase and implications of its relationship to thioredoxin. *Nature* 317:267–270
31. Lyles MM, Gilbert HF 1991 Catalysis of the oxidative folding of ribonuclease A by protein disulfide isomerase: dependence of the rate on the composition of the redox buffer. *Biochemistry* 30:613–619
32. Imaoka S, Terano Y, Funae Y 1990 Changes in the amount of cytochrome P-450s in rat hepatic microsomes with starvation. *Arch Biochem Biophys* 278:168–178
33. Noiva R 1999 Protein disulfide isomerase: the multifunctional redox chaperone of the endoplasmic reticulum. *Semin Cell Dev Biol* 10:481–493
34. Primm TP, Gilbert HF 2001 Hormone binding by protein disulfide isomerase, a high capacity hormone reservoir of the endoplasmic reticulum. *J Biol Chem* 276:281–286
35. Horiuchi R, Yamauchi K, Hayashi H, Koya S, Takeuchi Y, Kato K, Kobayashi M, Takikawa H 1989 Purification and characterization of 55-kDa protein with 3,5,3'-triiodo-L-thyronine-binding activity and protein disulfide-isomerase activity from beef liver membrane. *Eur J Biochem* 183:529–538
36. Guthapfel R, Queguen P, Quemeneur E 1996 Reexamination of hormone-binding properties of protein disulfide-isomerase. *Eur J Biochem* 242:315–319
37. Turano C, Coppari S, Altieri F, Ferraro A 2002 Proteins of the PDI family: unpredicted non-ER locations and functions. *J Cell Physiol* 193:154–163
38. Tsibris JC, Hunt LT, Ballejo G, Barker WC, Toney LJ, Spellacy WN 1989 Selective inhibition of protein disulfide isomerase by estrogens. *J Biol Chem* 264:13967–13970
39. Horiuchi R, Johnson ML, Willingham MC, Pastan I, Cheng S 1982 Affinity labeling of the plasma membrane 3,3',5-triiodo-L-thyronine receptor in GH3 cells. *Proc Natl Acad Sci USA* 79:5527–5531
40. Hasumura S, Kitagawa S, Lovelace E, Willingham MC, Pastan I, Cheng S 1986 Characterization of a membrane-associated 3,3',5-triiodo-L-thyronine binding protein by use of monoclonal antibodies. *Biochemistry* 25:7881–7888
41. Denver RJ, Pavgi S, Shi YB 1997 Thyroid hormone-dependent gene expression program for *Xenopus* neural development. *J Biol Chem* 272:8179–8188
42. Obata T, Kitagawa S, Gong QH, Pastan I, Cheng SY 1988 Thyroid hormone down-regulates p55, a thyroid hormone-binding protein that is homologous to protein disulfide isomerase and the  $\beta$ -subunit of prollyl-4-hydroxylase. *J Biol Chem* 263:782–785
43. Yoshikawa S, Kamada M, Maegawa M, Yamamoto S, Irahara M, Yamano S, Aono T, Kido H, Koide SS 2000 Hormonal control of mRNA expression of immunoglobulin binding factor in uterine cervix. *Biochem Biophys Res Commun* 279:898–903
44. Ejima K, Nanri H, Araki M, Uchida K, Kashimura M, Ikeda M 1999 17 $\beta$ -Estradiol induces protein thiol/disulfide oxidoreductases and protects cultured bovine aortic endothelial cells from oxidative stress. *Eur J Endocrinol* 140:608–613
45. Walker KW, Gilbert HF 1997 Scanning and escape during protein-disulfide isomerase-assisted protein folding. *J Biol Chem* 272:8845–8848
46. Puig A, Gilbert HF 1994 Protein disulfide isomerase exhibits chaperone and anti-chaperone activity in the oxidative refolding of lysozyme. *J Biol Chem* 269:7764–7771
47. Primm TP, Walker KW, Gilbert HF 1996 Facilitated protein aggregation. Effects of calcium on the chaperone and anti-chaperone activity of protein disulfide-isomerase. *J Biol Chem* 271:33664–33669
48. Delom F, Mallet B, Carayon P, Lejeune PJ 2001 Role of extracellular molecular chaperones in the folding of oxidized proteins. Refolding of colloidal thyroglobulin by protein disulfide isomerase and immunoglobulin heavy chain-binding protein. *J Biol Chem* 276:21337–21342
49. Liu XW, Sok DE 2004 Multimerization of bovine thyroglobulin, partially unfolded or partially unfolded/reduced; involvement of protein disulfide isomerase and glutathionylated disulfide linkage. *Arch Pharm Res* 27:1275–1283
50. Couet J, de Bernard S, Loosfelt H, Saunier B, Milgrom E, Misrahi M 1996 Cell surface protein disulfide-isomerase is involved in the shedding of human thyrotropin receptor ectodomain. *Biochemistry* 35:14800–14805
51. Bennett TA, Edwards BS, Sklar LA, Rogelj S 2000 Sulfhydryl regulation of L-selectin shedding: phenylarsine oxide promotes activation-independent L-selectin shedding from leukocytes. *J Immunol* 164:4120–4129
52. Bernal J 2002 Action of thyroid hormone in brain. *J Endocrinol Invest* 25:268–288
53. Wang L, Andersson S, Warner M, Gustafsson JA 2003 Estrogen receptor (ER) $\beta$  knockout mice reveal a role for ER $\beta$  in migration of cortical neurons in the developing brain. *Proc Natl Acad Sci USA* 100:703–708
54. Hillson DA, Lambert N, Freedman RB 1984 Formation and isomerization of disulfide bonds in proteins: protein disulfide-isomerase. *Methods Enzymol* 107:281–294
55. Farwell AP, Lynch RM, Okulicz WC, Comi AM, Leonard JL 1990 The actin cytoskeleton mediates the hormonally regulated translocation of type II iodothyronine 5'-deiodinase in astrocytes. *J Biol Chem* 265:18546–18553
56. Safran M, Leonard JL 1991 Characterization of a *N*-bromoacetyl-L-thyroxine affinity-labeled 55-kilodalton protein as protein disulfide isomerase in cultured glial cells. *Endocrinology* 129:2011–2016
57. Landel CC, Kushner PJ, Greene GL 1995 Estrogen receptor accessory proteins: effects on receptor-DNA interactions. *Environ Health Perspect* 103(Suppl 7):23–28

*Endocrinology* is published monthly by The Endocrine Society (<http://www.endo-society.org>), the foremost professional society serving the endocrine community.
